# Supplementary material for: Adsorption-assisted photocatalytic activity of nitrogen and sulfur codoped TiO2 under visible light irradiation
Source: Royal Society of Chemistry journal article supplement (doi:10.1039/c5cp02322j), 2015-01-01
Supplement: c5cp02322j1.pdf [file c5cp02322j1.pdf]

## Supporting Information

### Adsorption-Assisted Photocatalytic Activity of Nitrogen and Sulfur Codoped TiO<sub>2</sub> under Visible Light Irradiation

Junho Chung<sup>a</sup>, Jae Woo Chung,<sup>b,\*</sup> and Seung-Yeop Kwak<sup>a,\*</sup>

<sup>a</sup>Department of Materials Science and Engineering, Seoul National University, 1 Gwanak-ro, Gwanak-gu, Seoul 151-744, Korea

<sup>b</sup>Department of Organic Materials and Fiber Engineering, Soongsil University, 369 Sangdo-ro, Dongjak-gu, Seoul 156-743, Korea

\* Corresponding Author: **Seung-Yeop Kwak**; Tel.: +82-2-880-8365; Fax: +82-2-885-1748;

E-mail: [sykwak@snu.ac.kr](mailto:sykwak@snu.ac.kr)

**Jae Woo Chung**; Tel: +82-2-828-7047; Fax: +82-2-817-8346;

E-mail: [jwchung@ssu.ac.kr](mailto:jwchung@ssu.ac.kr)

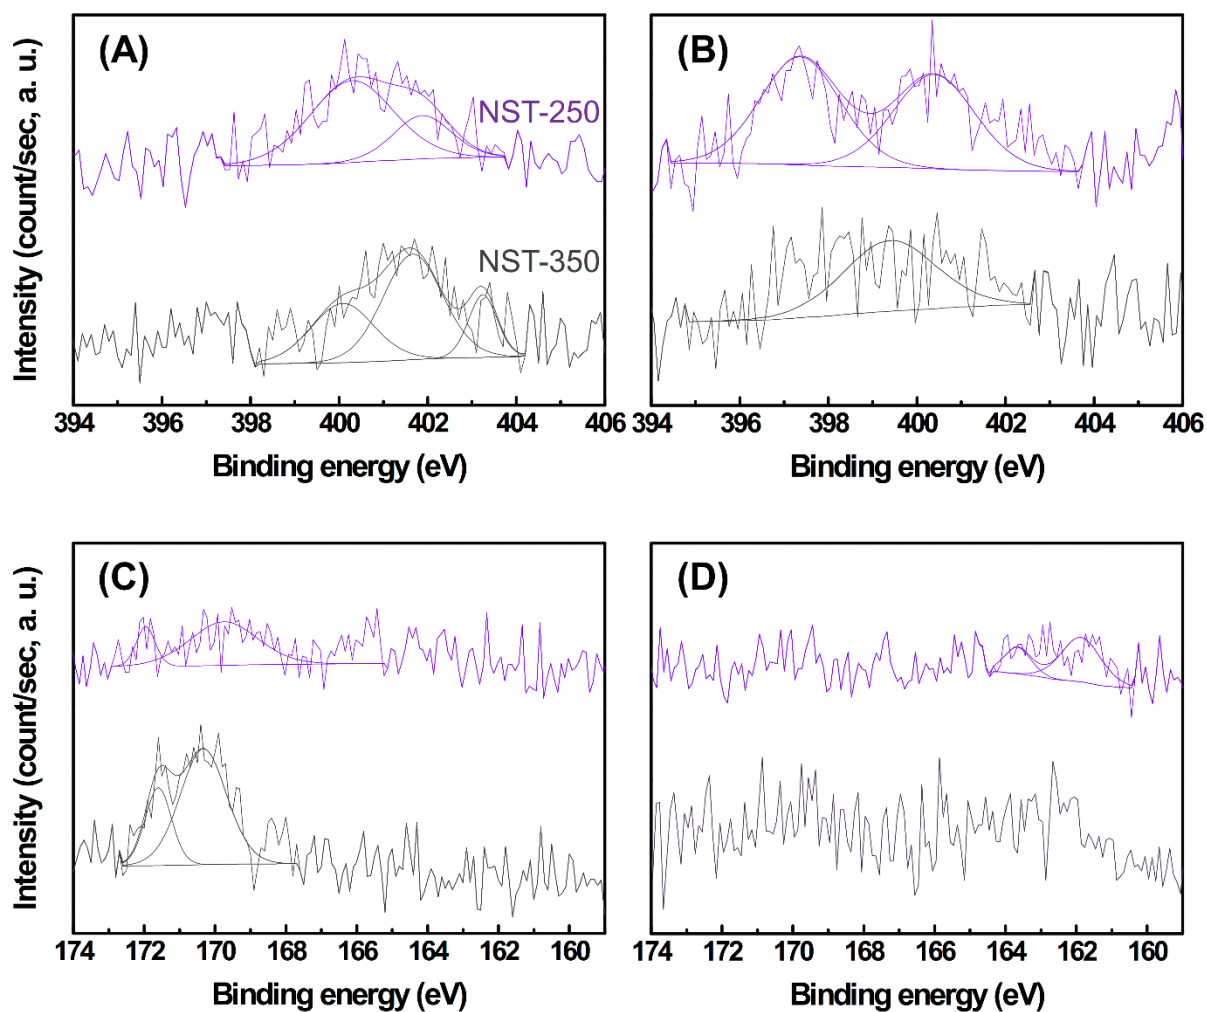

**Figure S1.** XPS spectra of (A) nitrogen (surface), (B) nitrogen (inside), (C) sulfur (surface) and (D) sulfur (inside). The sample names are NST-250 (1st line), NST-350 (2nd line).

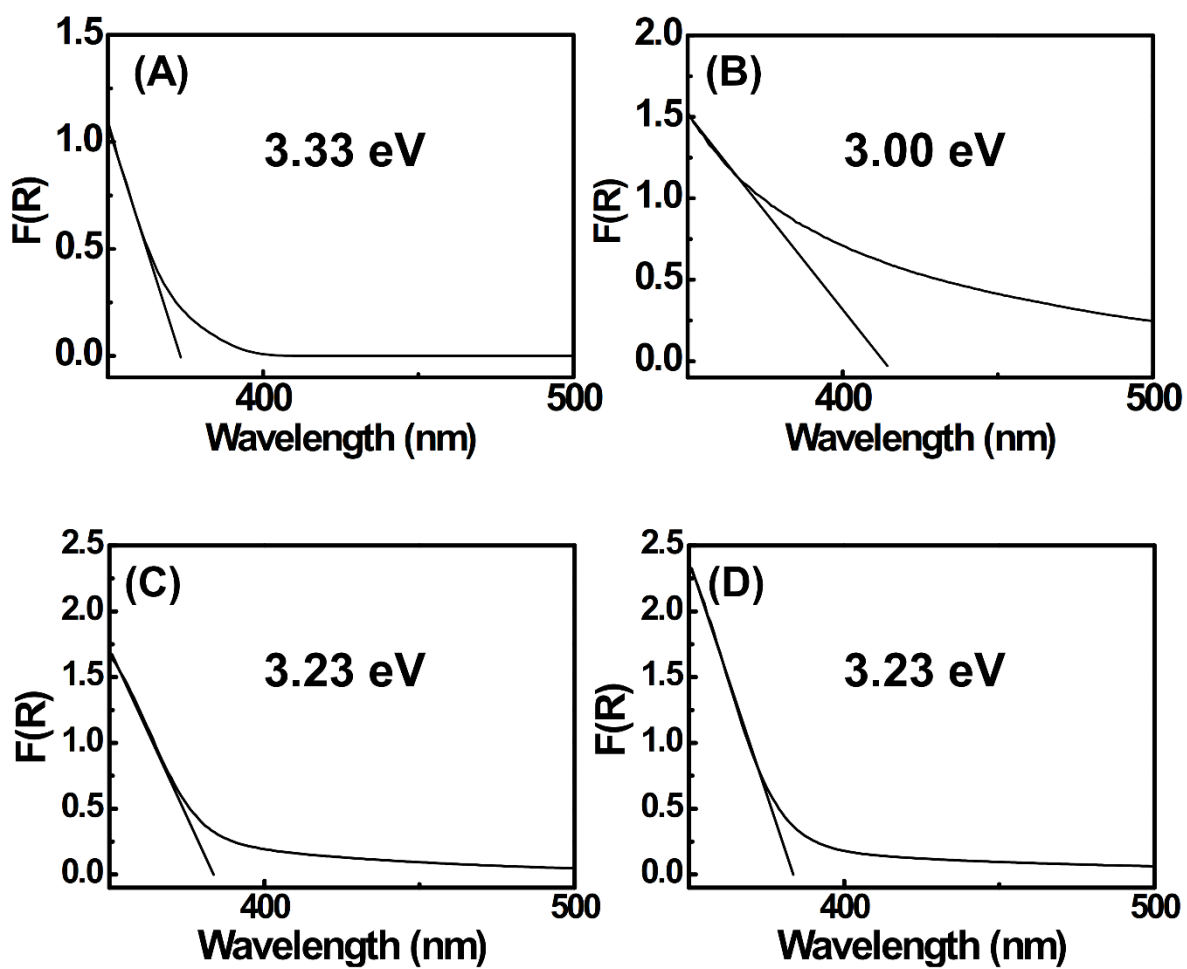

**Figure S2.** Absorbance at visible light region and band gap energy of (A) P25, (B) NST-As, (C) NST-350, (D) NST-400

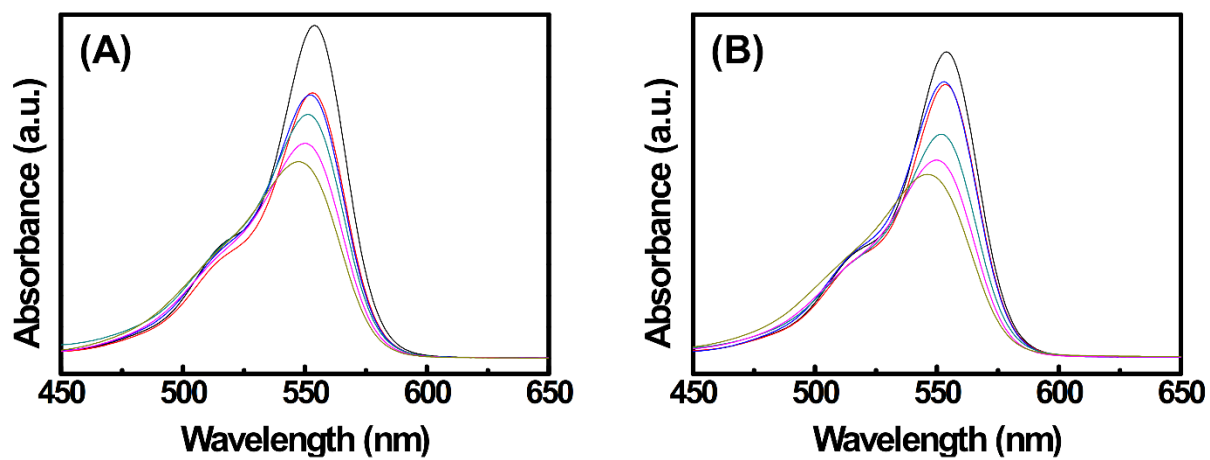

**Figure S3.** UV-Vis spectral changes of rhodamine B solution under visible light irradiation with (A) NST-350, and (B) NST-400

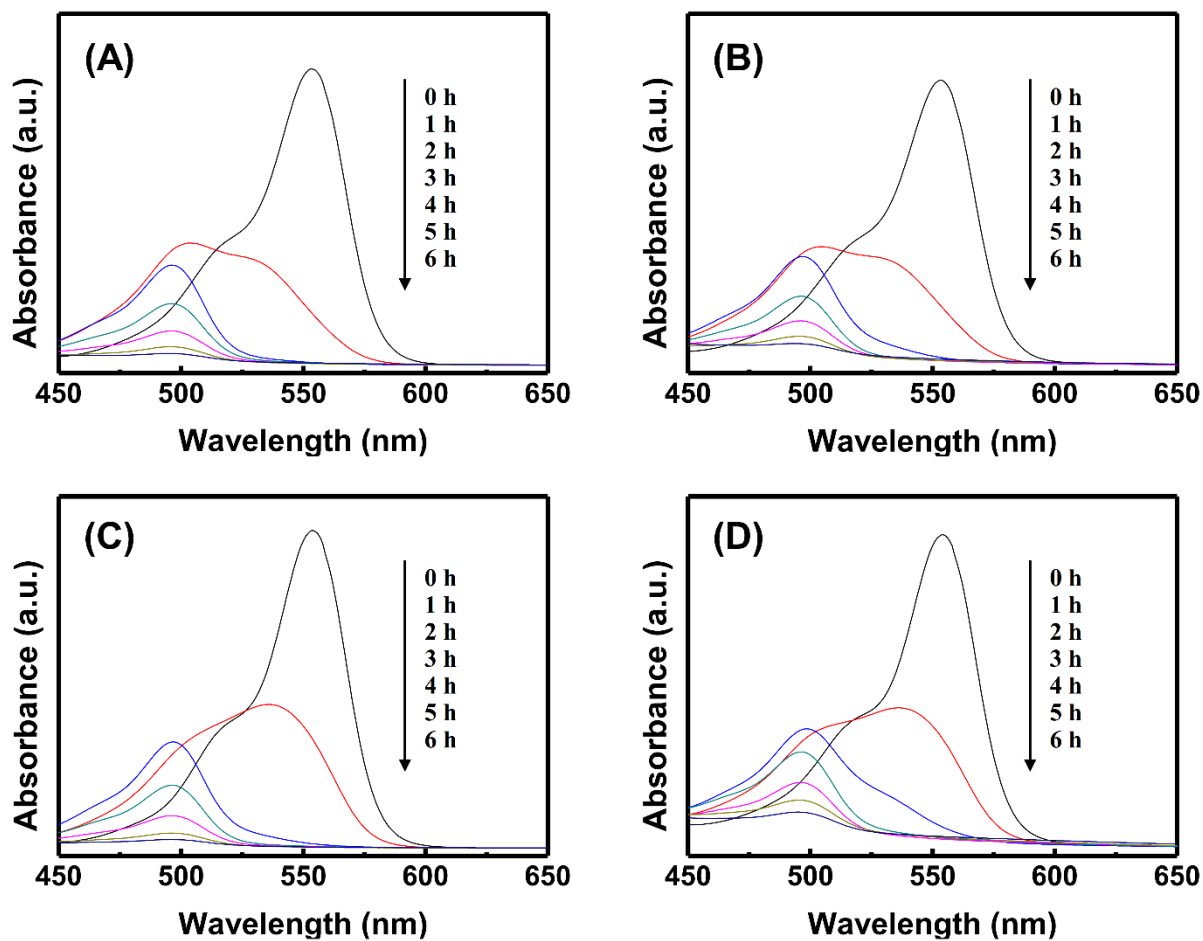

**Figure S4.** UV-Vis spectral changes of rhodamine B solution under visible light irradiation with NST-As in the (A) 1st cycle, (B) 2nd cycle, (C) 3rd cycle, and (D) 4th cycle

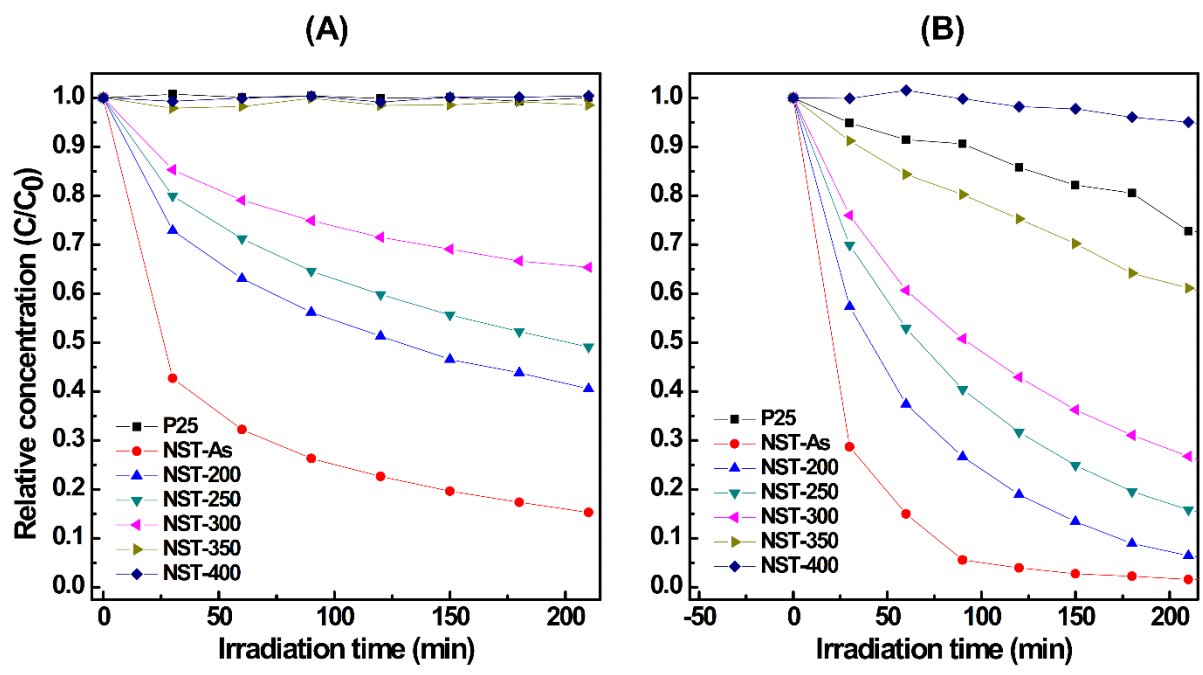

**Figure S5.** Relative concentration of (A) methylene blue in dark room and (B) under visible light irradiation

**Table S1.** Relative atomic ratios of the sulfur dopants in the NSTs, measured by ICP-AES.

| Sample     | NST-As | NST-200 | NST-250 | NST-300 | NST-350 | NST-400 |
|------------|--------|---------|---------|---------|---------|---------|
| S/Ti (at%) | 0.99   | 1.00    | 0.97    | 1.06    | 1.05    | 1.07    |

**Table S2.** Rhodamine B removal efficiency of NST-As under 4 cycles of photodecomposition test under visible light irradiation

| Cycle                    | 1st | 2nd | 3rd | 4th |
|--------------------------|-----|-----|-----|-----|
| Removal efficiency (2 h) | 99% | 97% | 99% | 93% |
